# Supplementary material for: Staphylococcus aureus vWF-binding protein triggers a strong interaction between clumping factor A and host vWF
Source: PubMed Central journal article supplement (PMC8041789; doi:10.1038/s42003-021-01986-6), 2021-04-12
Supplement: 42003_2021_1986_MOESM2_ESM.pdf [file 42003_2021_1986_MOESM2_ESM.pdf]

## Description of Additional Supplementary Files

**File name:** Supplementary Data 1

**Description:** Raw data used to draw each figure as tab-separated text (.tsv) files that can be imported into excel or opened with Notepad. In addition, we have included the R scripts used to draw the figures and tables and calculate statistics. These scripts can be run in RStudio Version 1.3.1073 or more recent.
